# Supplementary material for: Spatiotemporal Changes in Atomic and Molecular Architecture of Mineralized Bone under Pathogenic Conditions
Source: MDPI journal article supplement (doi:10.3390/cryst13030381), 2023-02-23
Supplement: s1 [file s1]

## Supplement material.

**Table S1.** Information about the specimens

| Samples | month and year of birth | Sex | ID   | Diagnosis         | Side  |
|---------|-------------------------|-----|------|-------------------|-------|
| i       | 09.1954                 | F   | 483  | Gonarthrosis g. 3 | right |
| ii      | 08.1957                 | F   | 753  | Gonarthrosis g. 3 | right |
| iii     | 12.1954                 | F   | 853  | Gonarthrosis g.3  | right |
| iv      | 10.1935                 | F   | 1004 | Gonarthrosis g. 3 | right |
| v       | 07.1962                 | F   | 1061 | Gonarthrosis g. 3 | right |
| vi      | 11.1946                 | F   | 865  | Gonarthrosis g. 3 | right |
| vii     | 11.1955                 | F   | 1127 | Gonarthrosis g. 3 | left  |
| viii    | 05.1967                 | F   | 1315 | Gonarthrosis g. 3 | left  |
| ix      | 06.1947                 | F   | 1742 | Gonarthrosis g. 3 | left  |
| x       | 12.1945                 | F   | 1704 | Gonarthrosis g. 3 | right |
